# Supplementary material for: Genetic diversity of wild and cultivated Coffea canephora in northeastern DR Congo and the implications for conservation
Source: PubMed Central journal article supplement — Am J Bot. 2021 Dec 22;108(12):2425–34. doi: 10.1002/ajb2.1769 (PMC9305747; doi:10.1002/ajb2.1769), 2021-12-22
Supplement: AJB2-108-2425-s001.pdf [file AJB2-108-2425-s001.pdf]

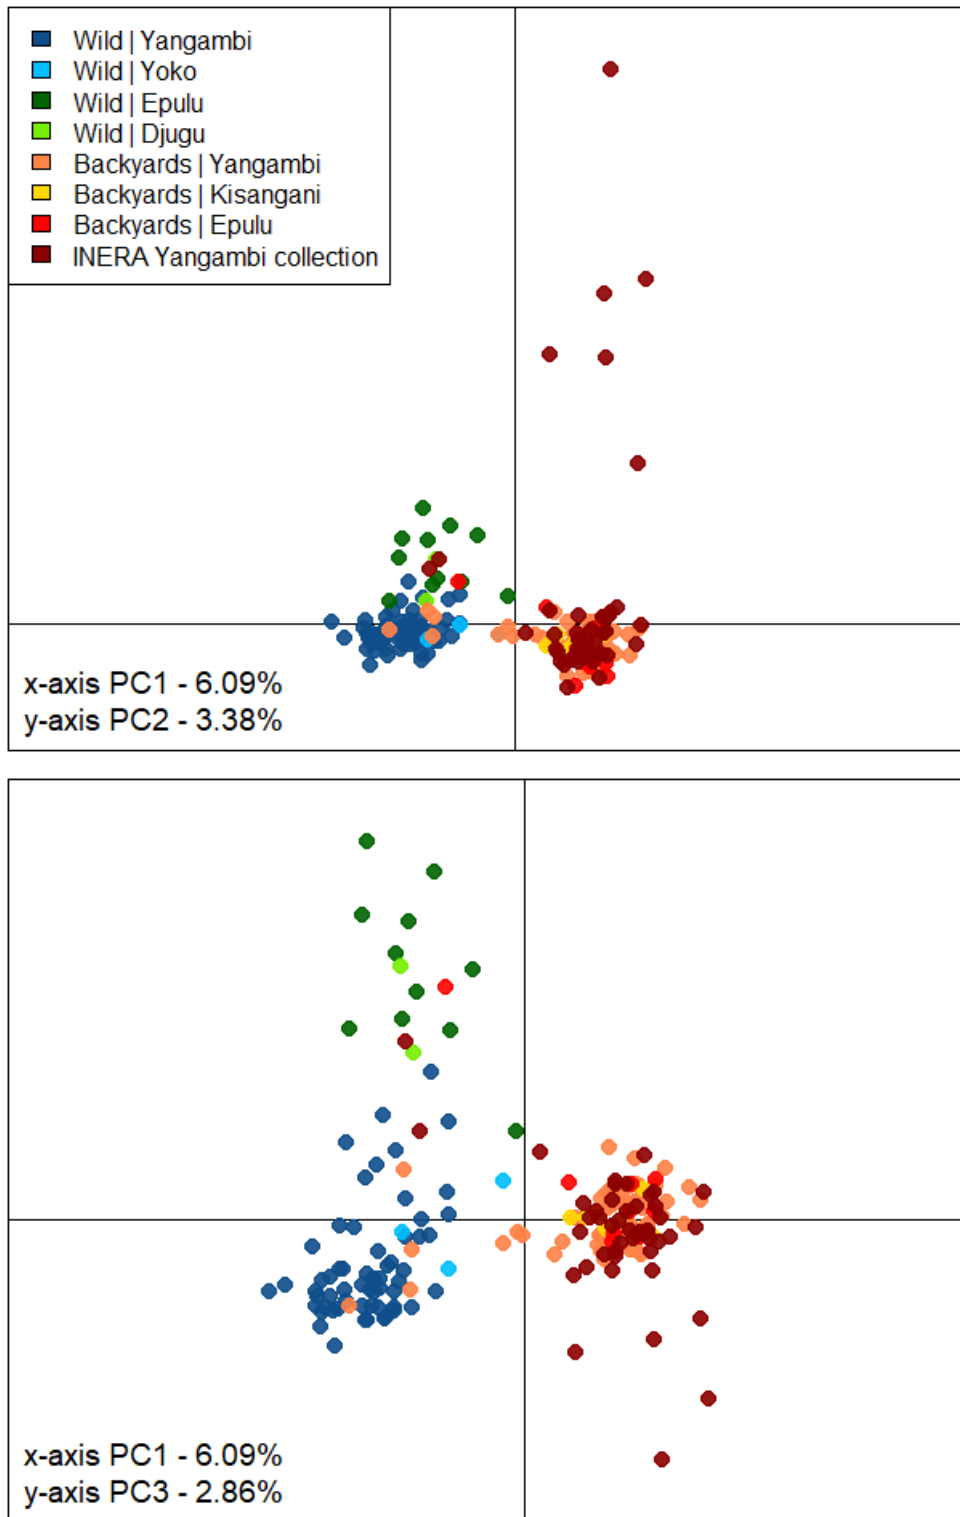

Appendix S5. Principal Component Analysis (PCA) of the genetic diversity in the *Coffea canephora* microsatellite dataset. *PC* stands for Principal Component.
