# Supplementary material for: Genetic diversity of wild and cultivated Coffea canephora in northeastern DR Congo and the implications for conservation
Source: PubMed Central journal article supplement — Am J Bot. 2021 Dec 22;108(12):2425–34. doi: 10.1002/ajb2.1769 (PMC9305747; doi:10.1002/ajb2.1769), 2021-12-22
Supplement: AJB2-108-2425-s003.pdf [file AJB2-108-2425-s003.pdf]

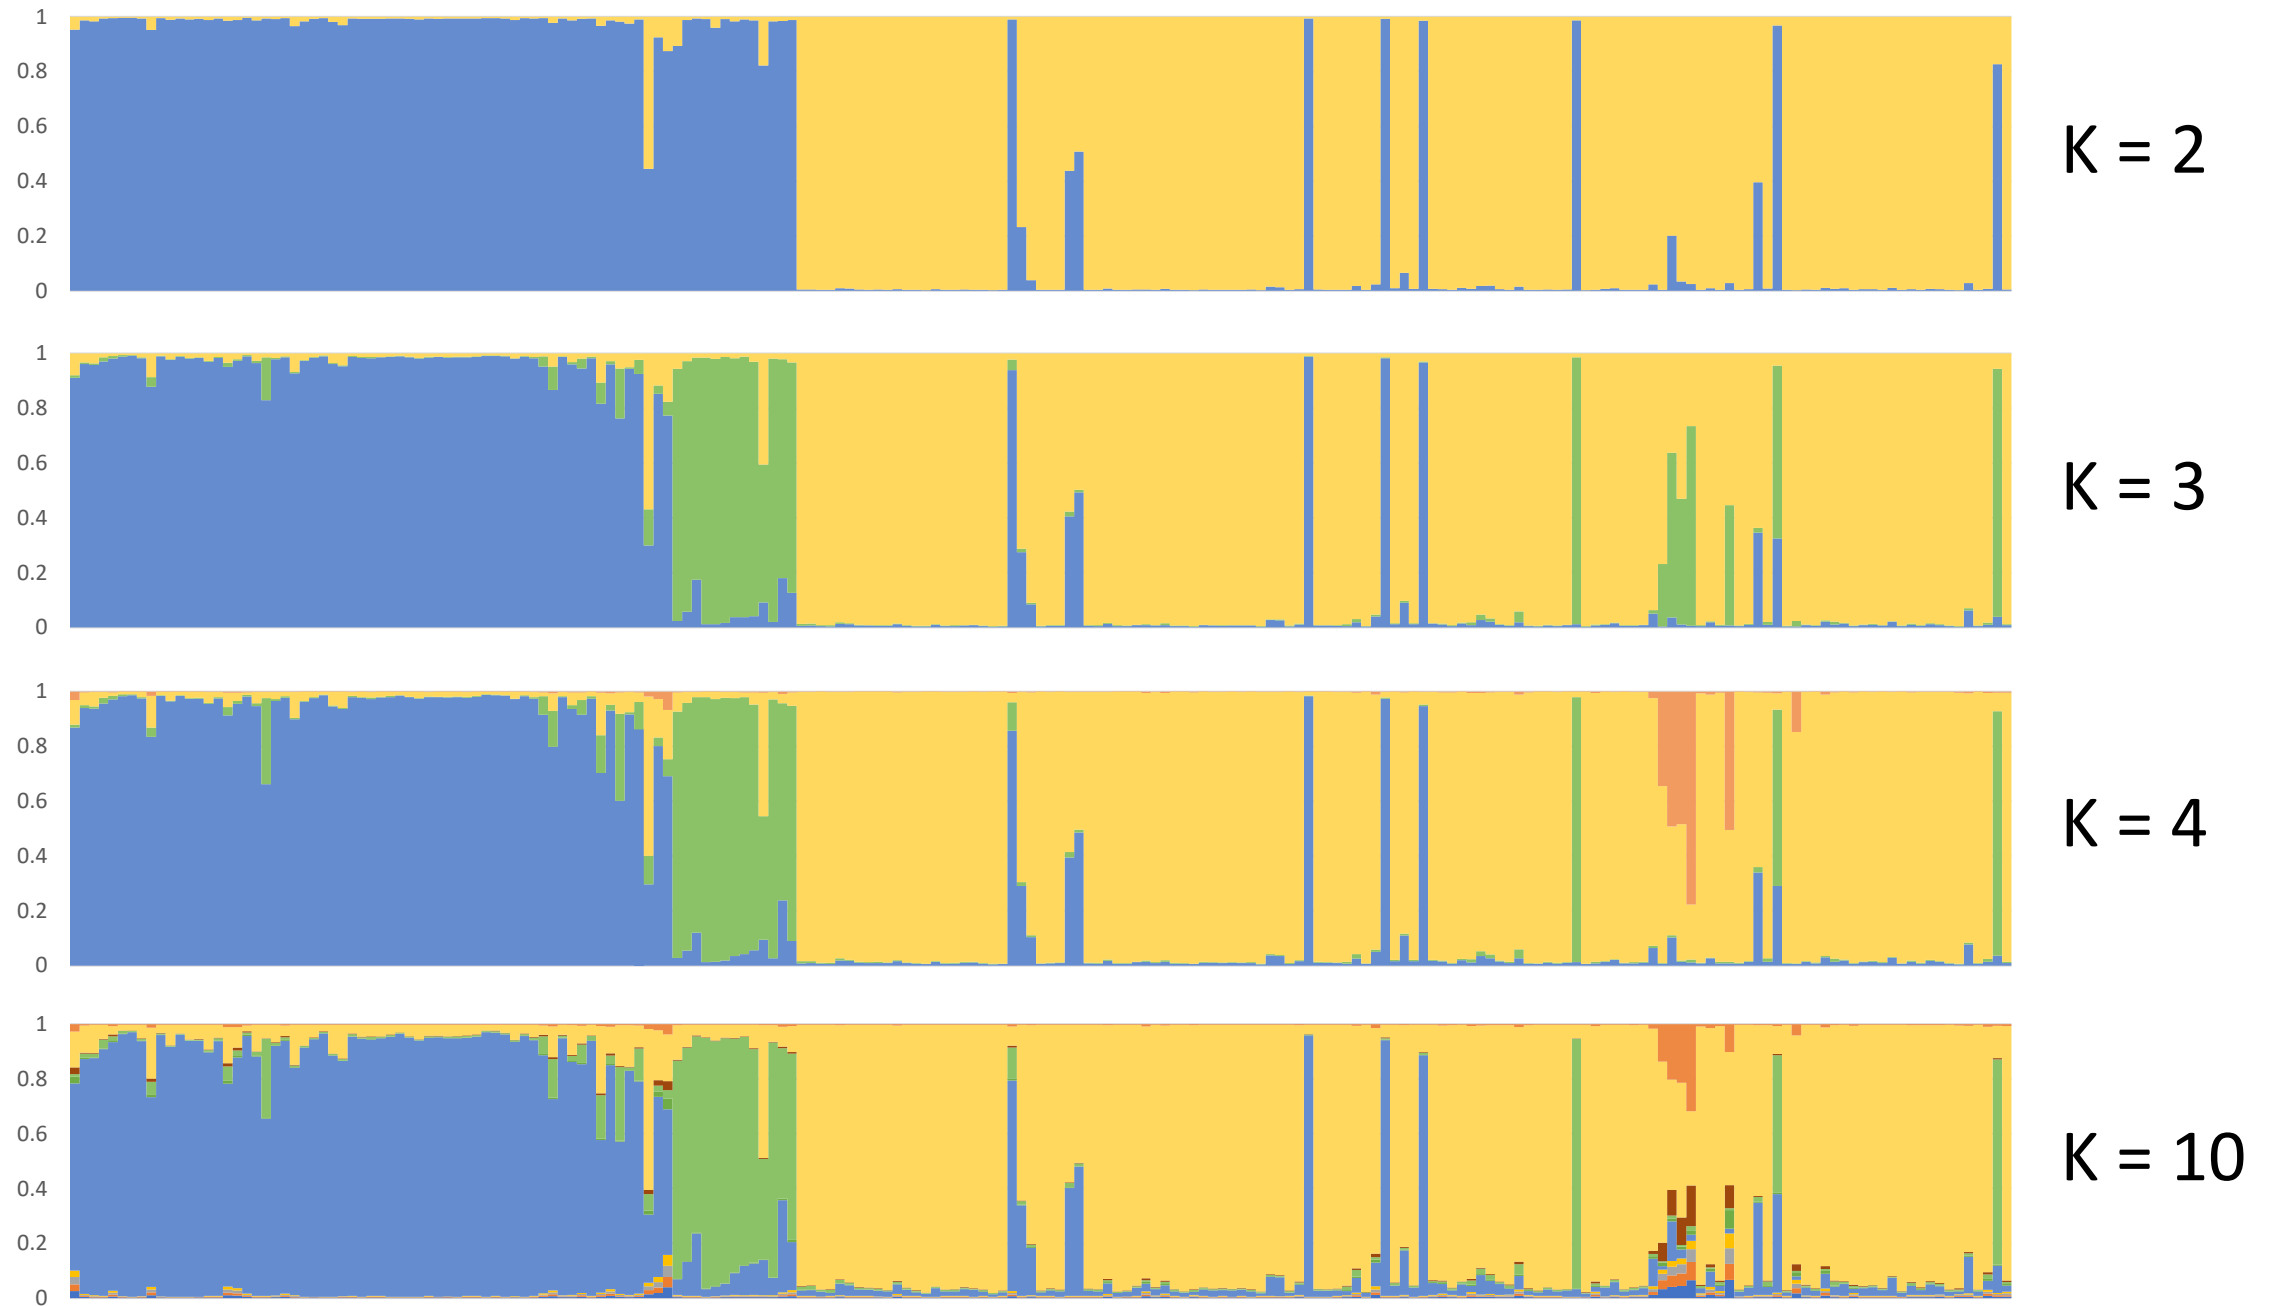

Appendix S4. The bar plots for K = 2 to K = 4, and K =10 representing the assignment probabilities (y-axis) inferred using STRUCTURE, for the complete *Coffea canephora* microsatellite dataset.
