# Supplementary figures and images for: Genetic diversity of wild and cultivated Coffea canephora in northeastern DR Congo and the implications for conservation
Source: PubMed Central journal article supplement — Am J Bot. 2021 Dec 22;108(12):2425–34. doi: 10.1002/ajb2.1769 (PMC9305747; doi:10.1002/ajb2.1769), 2021-12-22

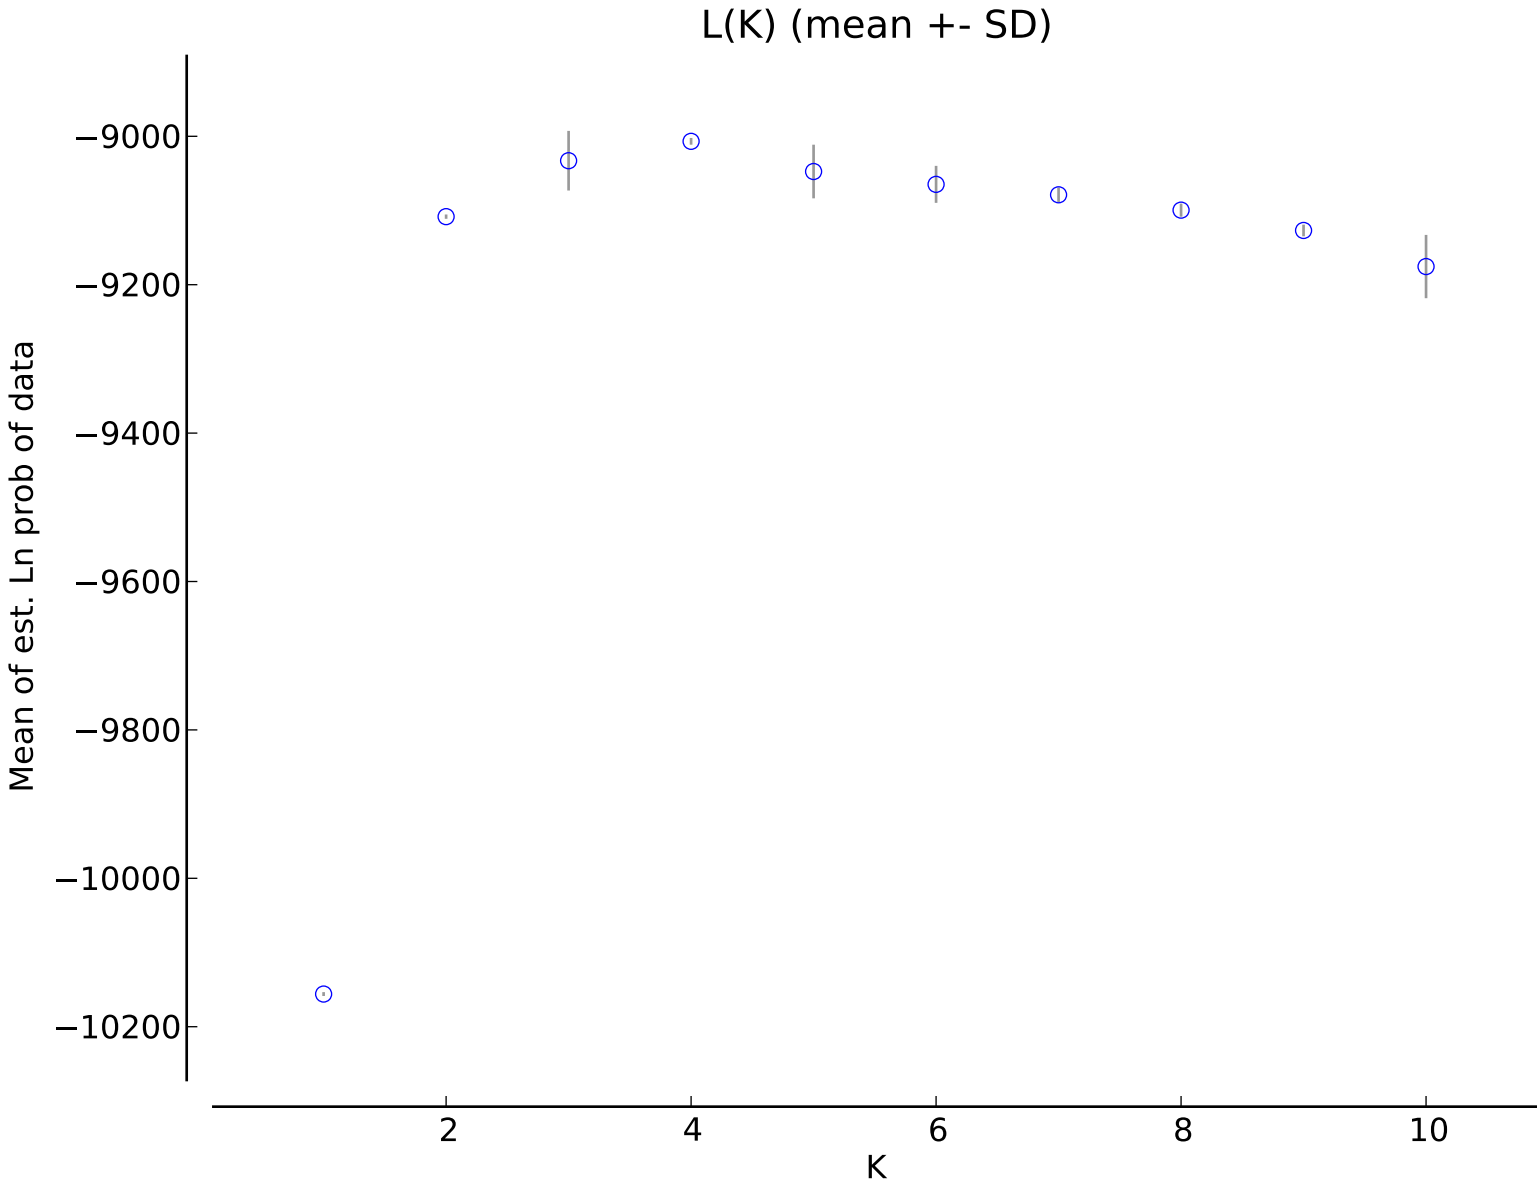

Supplement: AJB2-108-2425-s002.pdf [file AJB2-108-2425-s002.pdf]
